# Supplementary material
Source: Springer Nature journal article supplement (https://www.springermedizin.de/resource/supplementary/12879_2012_1984_MOESM2_ESM.pdf/9443500)

— 05-06 — 06-07 — 07-08 — 08-09 — 09-10 — 10-11 — 11-12

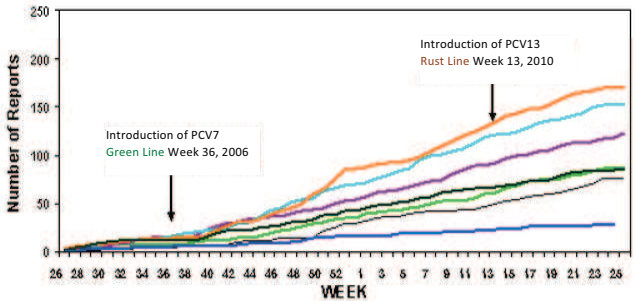

— 05-06 — 06-07 — 07-08 — 08-09 — 09-10 — 10-11 — 11-12

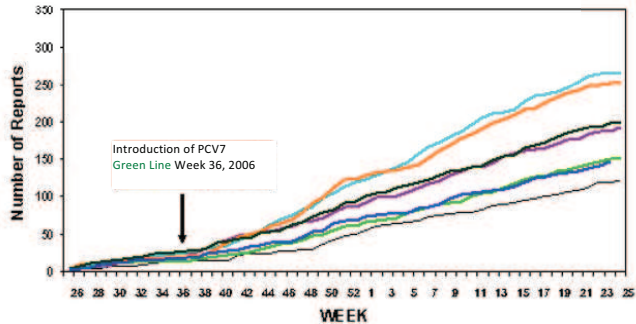

Supplement: MOESM2 [file 9443500]
